# Supplementary material
Source: publisher figshare collection journal article supplement (https://tandf.figshare.com/ndownloader/files/21902163)
Supplement: Supplementary file 1 [file 21902163]

| Supplementary Table 3 | | | | | | |
| --- | --- | --- | --- | --- | --- | --- |
| Table S-3  *Bivariate correlations between CELF-4 Core Language Score and discourse measures by level of analysis* | | | | | | |
|  |  | Genre | | | | |
| Level of analysis | Measure | All | Recount | Exposition | Persuasive | Narrative |
| Micro-linguistic | Total utterances | **.25**** | **.18*** | **.22*** | **.25*** | **.19*** |
|  | Mean length of utterance (words) | **.29**** | **.26 **** | **.18*** | **.25*** | .11 |
|  | Number of different words | **.35**** | **.26 **** | **.28**** | **.35**** | **.30**** |
|  | Total maze words | .08 | .05 | .06 | .07 | .08 |
|  | Percentage maze words | **-.17*** | **-.18*** | **-.14*** | **-.21*** | .01 |
|  | Clausal density | .08 | .15 | -.06 | .03 | .09 |
|  |  |  |  |  |  |  |
| Micro-structural | Total referential ties | **.27**** | **.23 *** | **.21*** | **.20*** | **.22*** |
|  | Cohesive adequacy | **.22*** | **.17*** | .15 | .14 | .10 |
|  |  |  |  |  |  |  |
| Macro-structural | Percentage correct information units | **.19*** | **.16*** | **.19*** | .12 | .08 |
|  | Correct information units per minute | .15 | .14 | **.17*** | .11 | .13 |
|  | Local coherence | .13 | .11 | **.18*** | .09 | -.08 |
|  | Global coherence | .03 | -.03 | .12 | -.02 | -.04 |
|  |  |  |  |  |  |  |
| Super-structural | Schema deviations | .14 | .10 | .20 | .07 | .14 |
|  | Genre shifts | .02 | .00 | .03 | -.04 | .00 |
|  | Order deviations | .07 | **-.18*** | .01 | -.01 | .00 |
|  | Restatements of question | **.17*** | .05 | **.19*** | .13 | .00 |
| *Note:* Values reported are Pearson’s correlation coefficients (r). Bolded values are significant at ** *p*<.001, **p*<.05*.* | | | | | | |
